# Supplementary material for: Evaluation of Droplet Digital Polymerase Chain Reaction (ddPCR) for the Absolute Quantification of Aspergillus species in the Human Airway
Source: Int J Mol Sci. 2020 Apr 26;21(9):3043. doi: 10.3390/ijms21093043 (PMC7247686; doi:10.3390/ijms21093043)
Supplement: Supplementary file 1 [file ijms-21-03043-s001.xlsx]

## Sheet: Sheet1
MIQE Guidelines: Essential Information Checklist
Item	Details
Experimental Design
Definition of experimental and control groups	See material and methods
Number within each group	See material and methods
Sample
Description	See material and methods
Microdissection or macrodissection	Not applicable
Processing procedure	See material and methods
If frozen, how and how quickly?	Not applicable
If fixed, with what and how quickly?	Not applicable
Sample storage conditions and duration (especially for FFPE samples)	Not applicable
Nucleic acid extraction
Procedure and/or instrumentation	See material and methods
Name of kit and details of any modifications	See material and methods
Details of Dnase or RNase treatment	No treatment
Contamination assessment (DNA or RNA)	See material and methods
Nucleic acid quantification	See material and methods
Instrument and method	See material and methods
RNA integrity method/instrument	Not applicable
RIN/RQI or Cq of 3′ and 5′ transcripts	Not applicable
Inhibition testing (Cq dilutions, spike, or other)	See material and methods
Reverse transcription
Complete reaction conditions	Not applicable
Amount of RNA and reaction volume	Not applicable
Priming oligonucleotide (if using GSP) and concentration	Not applicable
Reverse transcriptase and concentration	Not applicable
Temperature and time	Not applicable
qPCR target information
Gene symbol	See material and methods
Sequence accession number	See material and methods
Amplicon length	See material and methods
In silico specificity screen (BLAST, and so on)	See material and methods
Pseudogenes, retropseudogenes, or other homologs?	None
Sequence alignment	See Appendix A
Secondary structure analysis of amplicon	See material and methods
qPCR oligonucleotides
Primer sequences	See material and methods
Location and identity of any modifications	See material and methods
qPCR protocol
Complete reaction conditions	See material and methods
Reaction volume and amount of cDNA/DNA	See material and methods
Primer, (probe), Mg , and dNTP concentrations	See material and methods
Polymerase identity and concentration	See material and methods
Buffer/kit identity and manufacturer	See material and methods
Additives (SYBR Green I, DMSO, and so forth)	Not applicable
Complete thermocycling parameters	See material and methods
Manufacturer of qPCR instrument	See material and methods
qPCR validation
Specificity (gel, sequence, melt, or digest)	See material and methods
For SYBR Green I, Cq of the NTC	Not applicable
Calibration curves with slope and y intercept	As showed in results section 2.2
PCR efficiency calculated from slope	As showed in results section 2.2
r2 of calibration curve	As showed in results section 2.2
Linear dynamic range	As showed in results section 2.2
Cq variation at LOD	As showed in results section 2.2
Evidence for LOD	As showed in results section 2.2
If multiplex, efficiency and LOD of each assay	As showed in results section 2.2
Data analysis
qPCR analysis program (source, version)	See material and methods
Method of Cq determination	See material and methods
Outlier identification and disposition	As showed in results section 2.3
Results for NTCs	As showed in results section 2.3
Justification of number and choice of reference genes	Not applicable
Description of normalization method	Not applicable
Number and stage (reverse transcription or qPCR) of technical replicates	See material and methods
Repeatability (intraassay variation)	See material and methods
Statistical methods for results significance	See material and methods
Software (source, version)	See material and methods
